# Supplementary material for: Evaluation of the Impact of Population Management on the Genetic Parameters of Selected Spiral-Horned Antelopes
Source: MDPI journal article supplement (doi:10.3390/biology13020104), 2024-02-07
Supplement: s1 [file s1]

**Table S1.** Overview of number of samples analyzed in this study, categorized with regards to the taxa and institutions of samples collection.

| <b>Institution</b>                    | <b>Country</b> | <b>Number of samples</b> |
|---------------------------------------|----------------|--------------------------|
| <b>Mountain bongo</b>                 |                | <b>13</b>                |
| GaiaZOO Kerkrade                      | Netherlands    | 1                        |
| Knowsley Safari                       | United Kingdom | 1                        |
| Safari de Peaugres                    | France         | 1                        |
| Safari Park Dvůr Králové              | Czechia        | 8                        |
| unknown                               | -              | 2                        |
| <b>Nyala</b>                          |                | <b>65</b>                |
| Africa Alive Zoological Reserve       | United Kingdom | 1                        |
| Edinburgh Zoo                         | United Kingdom | 7                        |
| Hellabrunn Zoo Munich                 | Germany        | 1                        |
| Jihlava Zoo                           | Czechia        | 3                        |
| Marwell Zoo                           | United Kingdom | 3                        |
| Pilsen Zoo                            | Czechia        | 10                       |
| Safari Park Dvůr Králové              | Czechia        | 28                       |
| Vienna Zoo                            | Austria        | 7                        |
| Zoo Hannover                          | Germany        | 5                        |
| <b>Sitatunga</b>                      |                | <b>32</b>                |
| Africa Alive Zoological Reserve       | United Kingdom | 1                        |
| Exmoor Zoo                            | United Kingdom | 2                        |
| Knowsley Safari                       | United Kingdom | 1                        |
| Safari Park Dvůr Králové              | Czechia        | 19                       |
| Serengeti-Park Hodenhagen             | Germany        | 1                        |
| Zoo African Safari Plaisance-du-Touch | France         | 1                        |
| unknown                               | -              | 7                        |
| <b>Lesser kudu</b>                    |                | <b>42</b>                |
| Hannover Zoo                          | Germany        | 2                        |
| Safari Park Dvůr Králové              | Czechia        | 35                       |
| Serengeti-Park Hodenhagen             | Germany        | 1                        |
| unknown                               | -              | 4                        |
| <b>Greater kudu<sup>1</sup></b>       |                | <b>31</b>                |
| GaiaZOO Kerkrade                      | Netherlands    | 2                        |
| Hellabrunn Zoo Munich                 | Germany        | 2                        |
| Pilsen Zoo                            | Czechia        | 2                        |
| Safari Park Dvůr Králové              | Czechia        | 16                       |
| Serengeti-Park Hodenhagen             | Germany        | 1                        |
| Zoo Boissière du Doré                 | France         | 1                        |
| Zoo La Palmyre                        | France         | 2                        |
| unknown                               | -              | 5                        |
| <b>Common eland<sup>2</sup></b>       |                | <b>36</b>                |
| Hellabrunn Zoo Munich                 | Germany        | 2                        |
| Knowsley Safari                       | United Kingdom | 5                        |
| Safari Park Dvůr Králové              | Czechia        | 16                       |
| University Farm Estate Lány           | Czechia        | 9                        |
| Vienna Zoo                            | Austria        | 2                        |
| Zoo African Safari Plaisance-du-Touch | France         | 1                        |
| Zoo Hannover                          | Germany        | 1                        |

<sup>1</sup> samples were equally collected from Rotterdam Zoo (Netherlands) but were not used due to failure to amplify

<sup>2</sup> samples were equally collected from Givskud Zoo (Denmark) but were not used due to failure to amplify

**Table S2.** Selected panel of 10 microsatellite loci, divided into two multiplexes, including sequences of their forward and reverse primers, used fluorescent dye label, length of fragments detected in this study, and original reference.

|                    | Forward primer<br>Reverse primer                      | Dye label | Detected size<br>in base pairs | Reference |
|--------------------|-------------------------------------------------------|-----------|--------------------------------|-----------|
| <b>Multiplex 1</b> |                                                       |           |                                |           |
| BL42               | CAAGGTCAAGTCCAAATGCC<br>GCATTTTGTGTTAATTTCATGC        | FAM       | 279-315                        | [96]      |
| BRR                | TGCTCTTACCTGCCACACCCG<br>CCCTCTTCTCACCCCCAAAAC        | NED       | 233-261                        | [97]      |
| CSRM60             | AAGATGTGATCCAAGAGAGAGGCA<br>AGGACCAGATCGTGAAAGGCA     | FAM       | 83-129                         | [98]      |
| ETH10              | GTTCAGGACTGGCCCTGCTAACA<br>CCTCCAGCCCACTTCTCTTCT      | FAM       | 200-226                        | [99]      |
| ETH225             | GATCACCTTGCCACTATTTCT<br>ACATGACAGCCAGCTGCTACT        | NED       | 131-165                        | [100]     |
| INRA011            | CGAGTTTCTTTCCTCGTGGTAGGC<br>GCTCGGCACATCTTCCTTAGCAACT | VIC       | 203-239                        | [101]     |
| <b>Multiplex 2</b> |                                                       |           |                                |           |
| BM4505             | TTATCTTGGCTTCTGGGTGC<br>ATCTTCACTTGGGATGCAGG          | FAM       | 239-291                        | [96]      |
| CSSM42             | GGGAAGGTCCTAACTATGGTTGAG<br>ACCCTCACTTCTAACTGCATTG    | PET       | 156-222                        | [102]     |
| INRA107            | TCCCAGATACAGATGCAACAG<br>GGAGAGCCGAGGGCTTCAGC         | FAM       | 148-180                        | [103]     |
| SPS113             | CCTCCACACAGGCTTCTCTGACTT<br>CCTAACTTGCTTGAGTTATTGC    | PET       | 127-155                        | [104]     |

**Table S3.** List of sequences from the National Center for Biotechnology Information (NCBI) Nucleotide database [56] used in this study, including their accession numbers, countries of origin, and source publications

| Accession number      | Country of origin              | Reference |
|-----------------------|--------------------------------|-----------|
| <b>Mountain bongo</b> |                                |           |
| EU040245.1            | Kenya                          | [68]      |
| EU040246.1            | Kenya                          | [68]      |
| JN632703.1            | Congo                          | [105]     |
| <b>Nyala</b>          |                                |           |
| AY530163.1            | Malawi                         | [106]     |
| AY530164.1            | Malawi                         | [106]     |
| AY530165.1            | Malawi                         | [106]     |
| AY530166.1            | Malawi                         | [106]     |
| AY530167.1            | Malawi                         | [106]     |
| AY530168.1            | Malawi                         | [106]     |
| AY530169.1            | Malawi                         | [106]     |
| AY530170.1            | Malawi                         | [106]     |
| AY530171.1            | Malawi                         | [106]     |
| AY530172.1            | Malawi                         | [106]     |
| AY530173.1            | Mozambique                     | [106]     |
| AY530174.1            | South Africa                   | [106]     |
| AY530175.1            | South Africa                   | [106]     |
| AY530176.1            | South Africa                   | [106]     |
| AY530177.1            | South Africa                   | [106]     |
| AY530178.1            | Zimbabwe                       | [106]     |
| AY530179.1            | South Africa                   | [106]     |
| AY530180.1            | South Africa                   | [106]     |
| AY530181.1            | South Africa                   | [106]     |
| JN632702.1            | South Africa                   | [105]     |
| <b>Sitatunga</b>      |                                |           |
| EF536357.1            | Gabon                          | [105]     |
| FJ823281.1            | Congo                          | [107]     |
| FJ823282.1            | Cameroon                       | [107]     |
| FJ823283.1            | Gabon                          | [107]     |
| FJ823284.1            | Gabon                          | [107]     |
| FJ823285.1            | Gabon                          | [107]     |
| FJ823286.1            | Gabon                          | [107]     |
| MH792168.1            | unknown                        | [108]     |
| <b>Lesser kudu</b>    |                                |           |
| AF301711.1            | Tanzania                       | [109]     |
| AF301712.1            | Tanzania                       | [109]     |
| EF536356.1            | Tanzania                       | [105]     |
| HG931349.1            | captive - Kenya <sup>1</sup>   | [65]      |
| HG931350.1            | captive - Somalia <sup>1</sup> | [65]      |
| HG931351.1            | captive - Kenya <sup>1</sup>   | [65]      |
| HG931352.1            | unknown                        | [65]      |
| HG931353.1            | captive - Kenya <sup>1</sup>   | [65]      |
| HG931354.1            | captive - Kenya <sup>1</sup>   | [65]      |
| HG931355.1            | captive - Kenya <sup>1</sup>   | [65]      |
| HG931356.1            | captive - Kenya <sup>1</sup>   | [65]      |
| HG931357.1            | captive - Kenya <sup>1</sup>   | [65]      |

|                     |                                |             |
|---------------------|--------------------------------|-------------|
| HG931358.1          | captive - Kenya <sup>1</sup>   | [65]        |
| HG931359.1          | captive - Kenya <sup>1</sup>   | [65]        |
| HG931360.1          | captive - Kenya <sup>1</sup>   | [65]        |
| HG931361.1          | captive - Kenya <sup>1</sup>   | [65]        |
| HG931362.1          | captive - Kenya <sup>1</sup>   | [65]        |
| HG931363.1          | captive - Kenya <sup>1</sup>   | [65]        |
| HG931364.1          | captive - Kenya <sup>1</sup>   | [65]        |
| HG931365.1          | captive - Kenya <sup>1</sup>   | [65]        |
| HG931366.1          | captive - Kenya <sup>1</sup>   | [65]        |
| HG931367.1          | captive - Kenya <sup>1</sup>   | [65]        |
| HG931368.1          | captive - Kenya <sup>1</sup>   | [65]        |
| HG931369.1          | captive - Kenya <sup>1</sup>   | [65]        |
| HG931371.1          | captive - Kenya <sup>1</sup>   | [65]        |
| HG931372.1          | captive - Kenya <sup>1</sup>   | [65]        |
| HG931373.1          | captive - Kenya <sup>1</sup>   | [65]        |
| HG931374.1          | captive - Somalia <sup>1</sup> | [65]        |
| HG931375.1          | captive - Somalia <sup>1</sup> | [65]        |
| HG931376.1          | captive - Somalia <sup>1</sup> | [65]        |
| HG931377.1          | captive - Kenya <sup>1</sup>   | [65]        |
| HG931378.1          | captive - Kenya <sup>1</sup>   | [65]        |
| HG931379.1          | captive - Kenya <sup>1</sup>   | [65]        |
| HG931380.1          | unknown                        | [65]        |
| HG931381.1          | unknown                        | [65]        |
| HG931382.1          | unknown                        | [65]        |
| HG931383.1          | unknown                        | [65]        |
| HG931384.1          | unknown                        | [65]        |
| HG931385.1          | unknown                        | [65]        |
| HG931386.1          | unknown                        | [65]        |
| HG931387.1          | unknown                        | [65]        |
| HG931388.1          | unknown                        | [65]        |
| HG931389.1          | unknown                        | [65]        |
| HG931390.1          | unknown                        | [65]        |
| HG931391.1          | unknown                        | [65]        |
| HG931392.1          | unknown                        | [65]        |
| HG931393.1          | captive - Kenya <sup>1</sup>   | [65]        |
| HG931394.1          | captive - Kenya <sup>1</sup>   | [65]        |
| HG931395.1          | captive - Kenya <sup>1</sup>   | [65]        |
| HG931396.1          | captive - Kenya <sup>1</sup>   | [65]        |
| HG931397.1          | captive - Kenya <sup>1</sup>   | [65]        |
| HG931398.1          | unknown                        | [65]        |
| KY628399.1          | unknown                        | unpublished |
| <b>Greater kudu</b> |                                |             |
| AF301621.1          | Tanzania                       | [109]       |
| AF301622.1          | Tanzania                       | [109]       |
| AF301623.1          | Tanzania                       | [109]       |
| AF301624.1          | Tanzania                       | [109]       |
| AF301625.1          | Tanzania                       | [109]       |
| AF301626.1          | Tanzania                       | [109]       |
| AF301627.1          | Tanzania                       | [109]       |
| AF301628.1          | Tanzania                       | [109]       |
| AF301629.1          | Tanzania                       | [109]       |

---

|            |          |       |
|------------|----------|-------|
| AF301630.1 | Botswana | [109] |
| AF301631.1 | Botswana | [109] |
| AF301632.1 | Botswana | [109] |
| AF301633.1 | Botswana | [109] |
| AF301634.1 | Botswana | [109] |
| AF301635.1 | Botswana | [109] |
| AF301636.1 | Botswana | [109] |
| AF301637.1 | Botswana | [109] |
| AF301638.1 | Botswana | [109] |
| AF301639.1 | Botswana | [109] |
| AF301640.1 | Botswana | [109] |
| AF301641.1 | Botswana | [109] |
| AF301642.1 | Botswana | [109] |
| AF301643.1 | Botswana | [109] |
| AF301644.1 | Namibia  | [109] |
| AF301645.1 | Namibia  | [109] |
| AF301646.1 | Namibia  | [109] |
| AF301647.1 | Namibia  | [109] |
| AF301648.1 | Namibia  | [109] |
| AF301649.1 | Namibia  | [109] |
| AF301650.1 | Namibia  | [109] |
| AF301651.1 | Namibia  | [109] |
| AF301652.1 | Namibia  | [109] |
| AF301653.1 | Namibia  | [109] |
| AF301654.1 | Namibia  | [109] |
| AF301655.1 | Namibia  | [109] |
| AF301656.1 | Namibia  | [109] |
| AF301657.1 | Namibia  | [109] |
| AF301658.1 | Namibia  | [109] |
| AF301659.1 | Namibia  | [109] |
| AF301660.1 | Namibia  | [109] |
| AF301661.1 | Namibia  | [109] |
| AF301662.1 | Namibia  | [109] |
| AF301663.1 | Namibia  | [109] |
| AF301664.1 | Tanzania | [109] |
| AF301665.1 | Tanzania | [109] |
| AF301666.1 | Tanzania | [109] |
| AF301667.1 | Tanzania | [109] |
| AF301668.1 | Tanzania | [109] |
| AF301669.1 | Tanzania | [109] |
| AF301670.1 | Tanzania | [109] |
| AF301671.1 | Tanzania | [109] |
| AF301672.1 | Tanzania | [109] |
| AF301673.1 | Zambia   | [109] |
| AF301674.1 | Namibia  | [109] |
| AF301675.1 | Namibia  | [109] |
| AF301676.1 | Zambia   | [109] |
| AF301677.1 | Zambia   | [109] |
| AF301678.1 | Zambia   | [109] |
| AF301679.1 | Tanzania | [109] |
| AF301680.1 | Tanzania | [109] |
| AF301681.1 | Tanzania | [109] |

---

---

|            |              |       |
|------------|--------------|-------|
| AF301682.1 | Tanzania     | [109] |
| AF301683.1 | Tanzania     | [109] |
| AF301684.1 | Tanzania     | [109] |
| AF301685.1 | Tanzania     | [109] |
| AF301686.1 | Tanzania     | [109] |
| AF301687.1 | Tanzania     | [109] |
| AF301688.1 | Namibia      | [109] |
| AF301689.1 | Namibia      | [109] |
| AF301690.1 | Namibia      | [109] |
| AF301691.1 | Namibia      | [109] |
| AF301692.1 | Namibia      | [109] |
| AF301693.1 | Namibia      | [109] |
| AF301694.1 | Namibia      | [109] |
| AF301695.1 | Botswana     | [109] |
| AF301696.1 | Botswana     | [109] |
| AF301697.1 | Namibia      | [109] |
| AF301698.1 | Namibia      | [109] |
| AF301699.1 | Namibia      | [109] |
| AF301700.1 | South Africa | [109] |
| AF301701.1 | Zimbabwe     | [109] |
| AF301702.1 | Zimbabwe     | [109] |
| AF301703.1 | Zimbabwe     | [109] |
| AF301704.1 | Zimbabwe     | [109] |
| AF301705.1 | Zimbabwe     | [109] |
| AF301706.1 | Zimbabwe     | [109] |
| AF301707.1 | Tanzania     | [109] |
| AF301708.1 | Tanzania     | [109] |
| AF301709.1 | Tanzania     | [109] |
| JN632708.1 | Tanzania     | [105] |
| MG839216.1 | unknown      | [66]  |
| MG839217.1 | unknown      | [66]  |
| OK642751.1 | South Africa | [110] |
| OK642752.1 | South Africa | [110] |
| OK642753.1 | South Africa | [110] |
| OK642754.1 | South Africa | [110] |
| OK642755.1 | South Africa | [110] |
| OK642756.1 | South Africa | [110] |
| OK642757.1 | South Africa | [110] |
| OK642758.1 | South Africa | [110] |
| OK642759.1 | South Africa | [110] |
| OK642760.1 | South Africa | [110] |
| OK642761.1 | South Africa | [110] |
| OK642762.1 | South Africa | [110] |
| OK642763.1 | South Africa | [110] |
| OK642764.1 | South Africa | [110] |
| OK642765.1 | South Africa | [110] |
| OK642766.1 | South Africa | [110] |
| OK642767.1 | South Africa | [110] |
| OK642768.1 | South Africa | [110] |
| OK642769.1 | South Africa | [110] |
| OK642770.1 | South Africa | [110] |
| OK642771.1 | South Africa | [110] |

---

|                     |              |       |
|---------------------|--------------|-------|
| OK642772.1          | South Africa | [110] |
| OK642773.1          | South Africa | [110] |
| OK642774.1          | South Africa | [110] |
| OK642775.1          | South Africa | [110] |
| OK642776.1          | South Africa | [110] |
| <b>Common eland</b> |              |       |
| GQ388117.1          | unknown      | [111] |
| GQ388118.1          | unknown      | [111] |
| GQ388119.1          | Ethiopia     | [111] |
| GQ388120.1          | Ethiopia     | [111] |
| GQ388121.1          | Ethiopia     | [111] |
| GQ388122.1          | Ethiopia     | [111] |
| GQ388123.1          | Kenya        | [111] |
| GQ388124.1          | Kenya        | [111] |
| GQ388125.1          | Kenya        | [111] |
| GQ388126.1          | Tanzania     | [111] |
| GQ388127.1          | Tanzania     | [111] |
| GQ388128.1          | Tanzania     | [111] |
| GQ388129.1          | Tanzania     | [111] |
| GQ388130.1          | Tanzania     | [111] |
| GQ388131.1          | Tanzania     | [111] |
| GQ388132.1          | Tanzania     | [111] |
| GQ388133.1          | Tanzania     | [111] |
| GQ388134.1          | Tanzania     | [111] |
| GQ388135.1          | Tanzania     | [111] |
| GQ388136.1          | Tanzania     | [111] |
| GQ388137.1          | Tanzania     | [111] |
| GQ388138.1          | Tanzania     | [111] |
| GQ388139.1          | Tanzania     | [111] |
| GQ388140.1          | Tanzania     | [111] |
| GQ388141.1          | Tanzania     | [111] |
| GQ388142.1          | Tanzania     | [111] |
| GQ388143.1          | Tanzania     | [111] |
| GQ388144.1          | Tanzania     | [111] |
| GQ388145.1          | Tanzania     | [111] |
| GQ388146.1          | Tanzania     | [111] |
| GQ388147.1          | Tanzania     | [111] |
| GQ388148.1          | Tanzania     | [111] |
| GQ388149.1          | Tanzania     | [111] |
| GQ388150.1          | Tanzania     | [111] |
| GQ388151.1          | Tanzania     | [111] |
| GQ388152.1          | Tanzania     | [111] |
| GQ388153.1          | Tanzania     | [111] |
| GQ388154.1          | Tanzania     | [111] |
| GQ388155.1          | Tanzania     | [111] |
| GQ388156.1          | Tanzania     | [111] |
| GQ388157.1          | Tanzania     | [111] |
| GQ388158.1          | Tanzania     | [111] |
| GQ388159.1          | Tanzania     | [111] |
| GQ388160.1          | Tanzania     | [111] |
| GQ388161.1          | Tanzania     | [111] |

---

|            |              |       |
|------------|--------------|-------|
| GQ388162.1 | Tanzania     | [111] |
| GQ388163.1 | Tanzania     | [111] |
| GQ388164.1 | Tanzania     | [111] |
| GQ388165.1 | Tanzania     | [111] |
| GQ388166.1 | Tanzania     | [111] |
| GQ388167.1 | Tanzania     | [111] |
| GQ388168.1 | Tanzania     | [111] |
| GQ388169.1 | Tanzania     | [111] |
| GQ388170.1 | Uganda       | [111] |
| GQ388171.1 | Uganda       | [111] |
| GQ388172.1 | Uganda       | [111] |
| GQ388173.1 | Uganda       | [111] |
| GQ388174.1 | Uganda       | [111] |
| GQ388175.1 | Uganda       | [111] |
| GQ388176.1 | Uganda       | [111] |
| GQ388177.1 | Uganda       | [111] |
| GQ388178.1 | Uganda       | [111] |
| GQ388179.1 | Uganda       | [111] |
| GQ388180.1 | Uganda       | [111] |
| GQ388181.1 | Botswana     | [111] |
| GQ388182.1 | Botswana     | [111] |
| GQ388183.1 | Botswana     | [111] |
| GQ388184.1 | Botswana     | [111] |
| GQ388185.1 | Botswana     | [111] |
| GQ388186.1 | Botswana     | [111] |
| GQ388187.1 | Botswana     | [111] |
| GQ388188.1 | Botswana     | [111] |
| GQ388189.1 | Botswana     | [111] |
| GQ388190.1 | Botswana     | [111] |
| GQ388191.1 | Namibia      | [111] |
| GQ388192.1 | Namibia      | [111] |
| GQ388193.1 | Namibia      | [111] |
| GQ388194.1 | Namibia      | [111] |
| GQ388195.1 | Namibia      | [111] |
| GQ388196.1 | Namibia      | [111] |
| GQ388197.1 | Namibia      | [111] |
| GQ388198.1 | Namibia      | [111] |
| GQ388199.1 | Namibia      | [111] |
| GQ388200.1 | Namibia      | [111] |
| GQ388201.1 | Namibia      | [111] |
| GQ388202.1 | Namibia      | [111] |
| GQ388203.1 | Namibia      | [111] |
| GQ388204.1 | Namibia      | [111] |
| GQ388205.1 | Namibia      | [111] |
| GQ388206.1 | Namibia      | [111] |
| GQ388207.1 | Namibia      | [111] |
| GQ388208.1 | Namibia      | [111] |
| GQ388209.1 | Namibia      | [111] |
| GQ388210.1 | Namibia      | [111] |
| GQ388211.1 | Namibia      | [111] |
| GQ388212.1 | South Africa | [111] |
| GQ388213.1 | Zambia       | [111] |

---

|            |          |       |
|------------|----------|-------|
| GQ388214.1 | Zambia   | [111] |
| GQ388215.1 | Zambia   | [111] |
| GQ388216.1 | Zambia   | [111] |
| GQ388217.1 | Zambia   | [111] |
| GQ388218.1 | Zimbabwe | [111] |
| GQ388219.1 | Zimbabwe | [111] |
| GQ388220.1 | Zimbabwe | [111] |
| GQ388221.1 | Zimbabwe | [111] |
| GQ388222.1 | Zimbabwe | [111] |
| GQ388223.1 | Zimbabwe | [111] |
| GQ388224.1 | Zimbabwe | [111] |
| GQ388225.1 | Zimbabwe | [111] |
| GQ388226.1 | Zimbabwe | [111] |
| GQ388227.1 | Zimbabwe | [111] |
| GQ388228.1 | Zimbabwe | [111] |
| GQ388229.1 | Zimbabwe | [111] |
| GQ388230.1 | Zimbabwe | [111] |
| GQ388231.1 | Zimbabwe | [111] |
| GQ388232.1 | Zimbabwe | [111] |
| GQ388233.1 | Zimbabwe | [111] |
| GQ388234.1 | Zimbabwe | [111] |
| GQ388235.1 | Zimbabwe | [111] |
| GQ388236.1 | Zimbabwe | [111] |
| GQ388237.1 | Zimbabwe | [111] |
| GQ388238.1 | Zimbabwe | [111] |
| JN632704.1 | Tanzania | [105] |
| MG839218.1 | unknown  | [66]  |
| MG839219.1 | unknown  | [66]  |
| MG839220.1 | unknown  | [66]  |

<sup>1</sup> sequences of captive animals with origin determined using studbook data, which were used due to low availability of sequences of wild individuals in lesser kudu

**Table S4.** Accession numbers of sequences from this study

| Sample code           | Accession number |
|-----------------------|------------------|
| <b>Mountain Bongo</b> |                  |
| BO01                  | PP061542         |
| BO02                  | PP061543         |
| BO03                  | PP061544         |
| BO04                  | PP061545         |
| BO05                  | PP061546         |
| BO06                  | PP061547         |
| BO07                  | PP061548         |
| BO08                  | PP061549         |
| <b>Nyala</b>          |                  |
| NY01                  | PP061550         |
| NY02                  | PP061551         |
| NY03                  | PP061552         |
| NY04                  | PP061553         |
| NY05                  | PP061554         |
| NY06                  | PP061555         |
| NY07                  | PP061556         |
| NY08                  | PP061557         |
| NY09                  | PP061558         |
| <b>Sitatunga</b>      |                  |
| SI01                  | PP061559         |
| SI02                  | PP061560         |
| SI03                  | PP061561         |
| SI04                  | PP061562         |
| SI05                  | PP061563         |
| SI06                  | PP061564         |
| SI07                  | PP061565         |
| SI08                  | PP061566         |
| SI09                  | PP061567         |
| SI10                  | PP061568         |
| SI11                  | PP061569         |
| SI12                  | PP061570         |
| SI13                  | PP061571         |
| <b>Lesser kudu</b>    |                  |
| LK01                  | PP061572         |
| LK02                  | PP061573         |
| LK03                  | PP061574         |
| LK04                  | PP061575         |
| LK05                  | PP061576         |
| LK06                  | PP061577         |
| LK07                  | PP061578         |
| LK08                  | PP061579         |
| <b>Greater kudu</b>   |                  |
| GK01                  | PP061580         |
| GK02                  | PP061581         |
| GK03                  | PP061582         |
| GK04                  | PP061583         |
| GK05                  | PP061584         |
| GK06                  | PP061585         |

|                     |          |
|---------------------|----------|
| GK07                | PP061586 |
| GK08                | PP061587 |
| GK09                | PP061588 |
| GK10                | PP061589 |
| GK11                | PP061590 |
| GK12                | PP061591 |
| GK13                | PP061592 |
| GK14                | PP061593 |
| GK15                | PP061594 |
| GK16                | PP061595 |
| GK17                | PP061596 |
| <b>Common eland</b> |          |
| CE01                | PP061597 |
| CE02                | PP061598 |
| CE03                | PP061599 |
| CE04                | PP061600 |
| CE05                | PP061601 |
| CE06                | PP061602 |
| CE07                | PP061603 |
| CE08                | PP061604 |
| CE09                | PP061605 |
| CE10                | PP061606 |
| CE11                | PP061607 |
| CE12                | PP061608 |
| CE13                | PP061609 |
| CE14                | PP061610 |
| CE15                | PP061611 |
| CE16                | PP061612 |
| CE17                | PP061613 |
| CE18                | PP061614 |

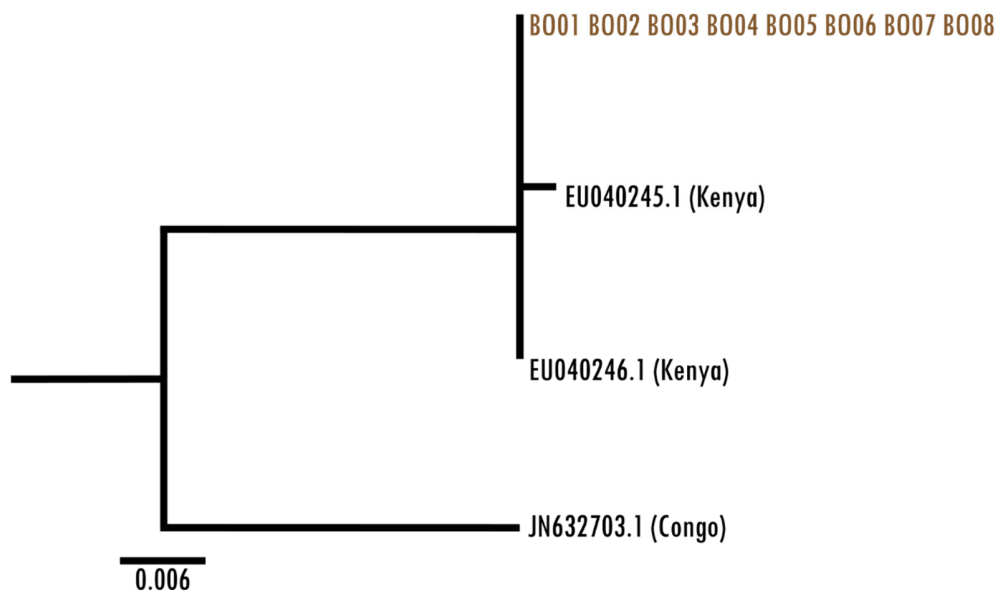

**Figure S1.** Neighbor-joining phylogenetic tree for mountain bongo. Samples from this study are shown in brown and identified by their unique codes (see Table S4). Sequences from the NCBI nucleotide database are referred to by their accession numbers, and their country of origin is indicated in brackets.

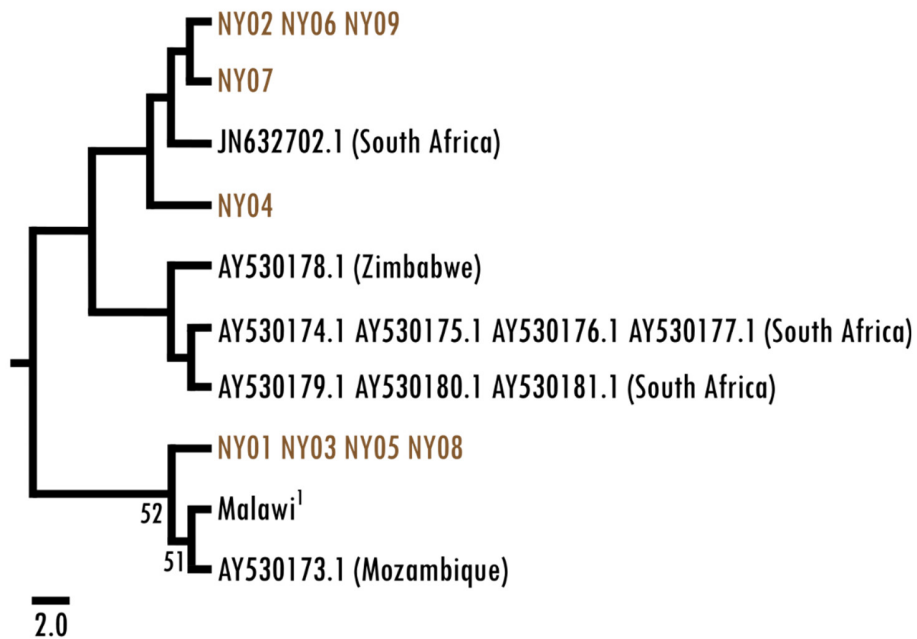

¹ AY530163.1 AY530164.1 AY530165.1 AY530166.1 AY530167.1 AY530168.1 AY530169.1 AY530170.1  
AY530171.1 AY530172.1

**Figure S2.** Neighbor-joining phylogenetic tree for nyala. Samples from this study are shown in brown and identified by their unique codes (see Table S4). Sequences from the NCBI nucleotide database are referred to by their accession numbers, and their country of origin is indicated in brackets.

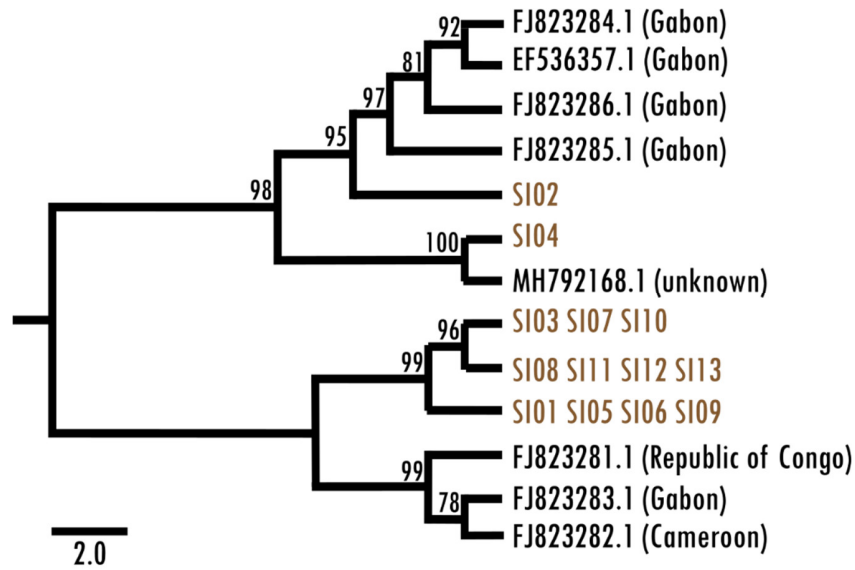

**Figure S3.** Neighbor-joining phylogenetic tree for sitatunga. Samples from this study shown in brown and identified by their unique codes (see Table S4). Sequences from the NCBI nucleotide database are referred to by their accession numbers, and their country of origin is indicated in brackets.

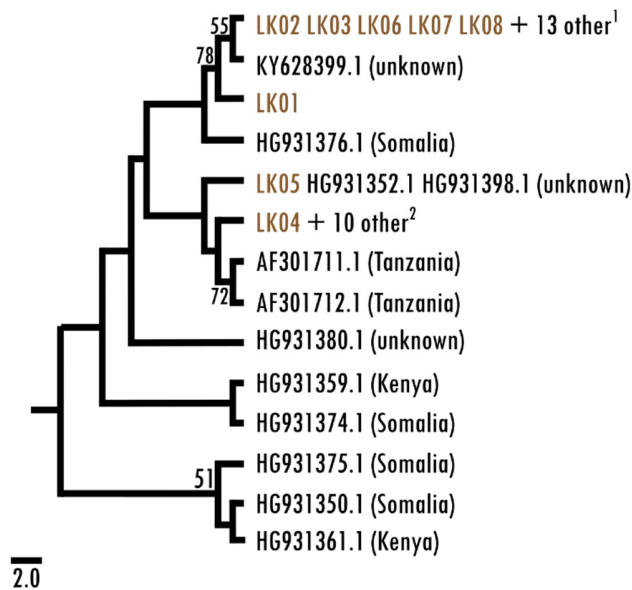

<sup>1</sup> HG931351.1 HG931357.1 HG931358.1 HG931360.1 HG931362.1 HG931363.1 HG931364.1 HG931365.1 HG931366.1 HG931367.1 HG931369.1 HG931371.1 HG931378.1 (Kenya)

<sup>2</sup> HG931349.1 HG931353.1 HG931354.1 HG931355.1 HG931356.1 HG931372.1 HG931373.1 (Kenya) HG931381.1 HG931386.1 HG931388.1 (unknown) EF536356.1 (Tanzania)

<sup>3</sup> HG931380.1 HG931382.1 HG931383.1 HG931384.1 HG931385.1 HG931387.1 HG931389.1 HG931390.1 HG931391.1 HG931392.1

<sup>4</sup> HG931359.1 HG931368.1 HG931377.1 HG931393.1 HG931394.1 HG931395.1 HG931396.1 HG931397.1 HG931379.1

**Figure S4.** Neighbor-joining phylogenetic tree for lesser kudu. Samples from this study are shown in brown and identified by their unique codes (see Table S4). Sequences from the NCBI nucleotide database are referred to by their accession numbers, and their country of origin is indicated in brackets.

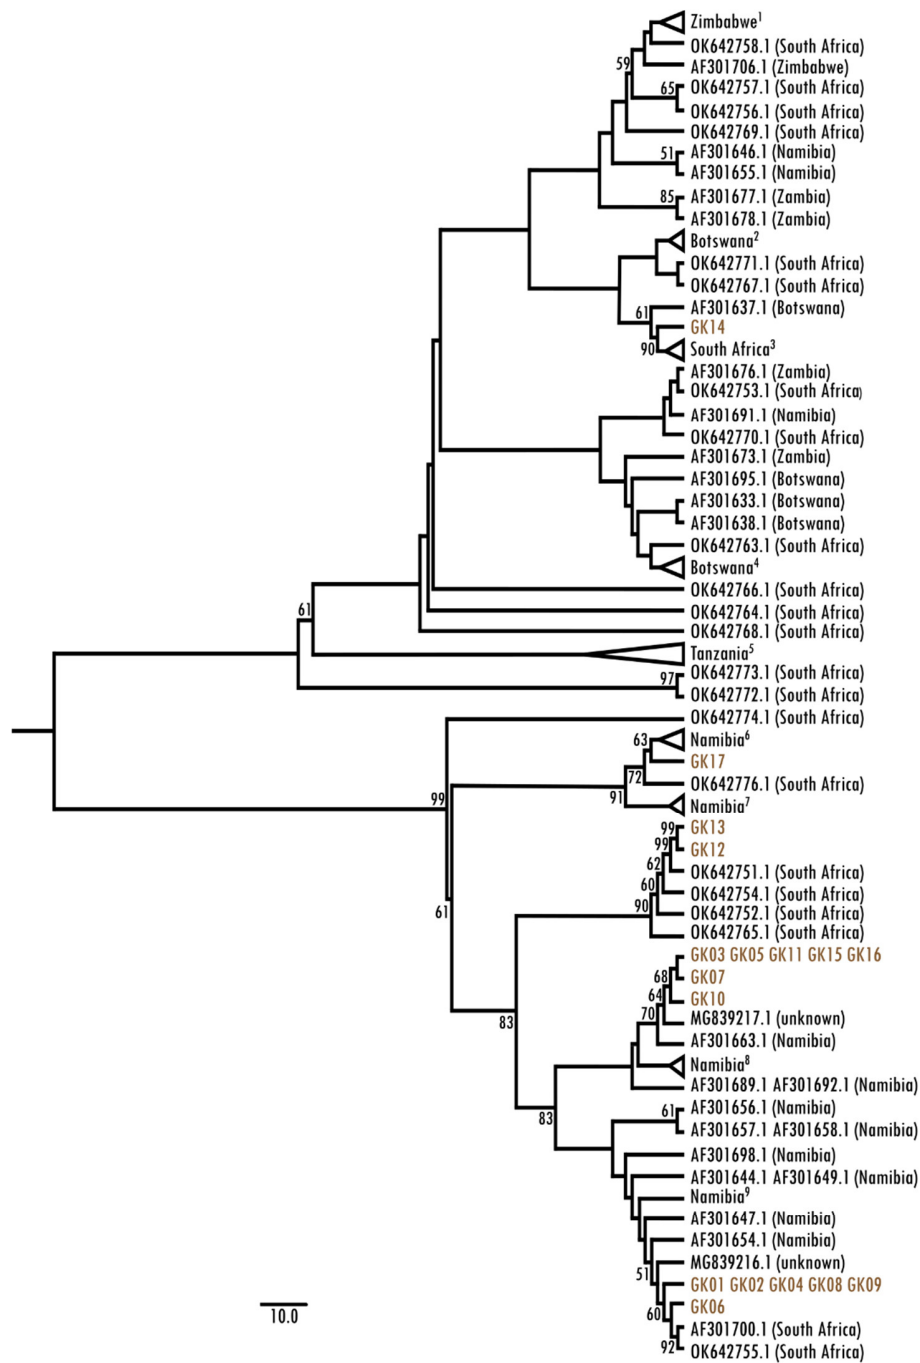

<sup>1</sup> AF301701.1 AF301702.1 AF301703.1 AF301704.1 AF301705.1

<sup>2</sup> AF301632.1 AF301635.1 AF301639.1 AF301640.1 AF301641.1 AF301642.1 AF301643.1

<sup>3</sup> OK642759.1 OK642760.1 OK642761.1 OK642762.1 OK642775.1

<sup>4</sup> AF301630.1 AF301631.1 AF301634.1 AF301636.1 AF301696.1

<sup>5</sup> AF301621.1 AF301622.1 AF301623.1 AF301624.1 AF301625.1 AF301626.1 AF301627.1 AF301628.1 AF301629.1 AF301664.1 AF301665.1 AF301666.1 AF301667.1 AF301668.1 AF301669.1 AF301670.1 AF301671.1 AF301672.1 AF301679.1 AF301680.1 AF301681.1 AF301682.1 AF301683.1 AF301684.1 AF301685.1 AF301686.1 AF301687.1 AF301707.1 AF301708.1 AF301709.1 JN632708.1

<sup>6</sup> AF301645.1 AF301648.1 AF301650.1 AF301652.1 AF301653.1

<sup>7</sup> AF301659.1 AF301660.1 AF301661.1 AF301674.1

<sup>8</sup> AF301662.1 AF301675.1 AF301697.1 AF301699.1

<sup>9</sup> AF301651.1 AF301688.1 AF301690.1 AF301693.1 AF301694.1

**Figure S5.** Neighbor-joining phylogenetic tree for greater kudu. Samples from this study are shown in brown and identified by their unique codes (see Table S4). Sequences from the NCBI nucleotide database are referred to by their accession numbers, and their country of origin is indicated in brackets.

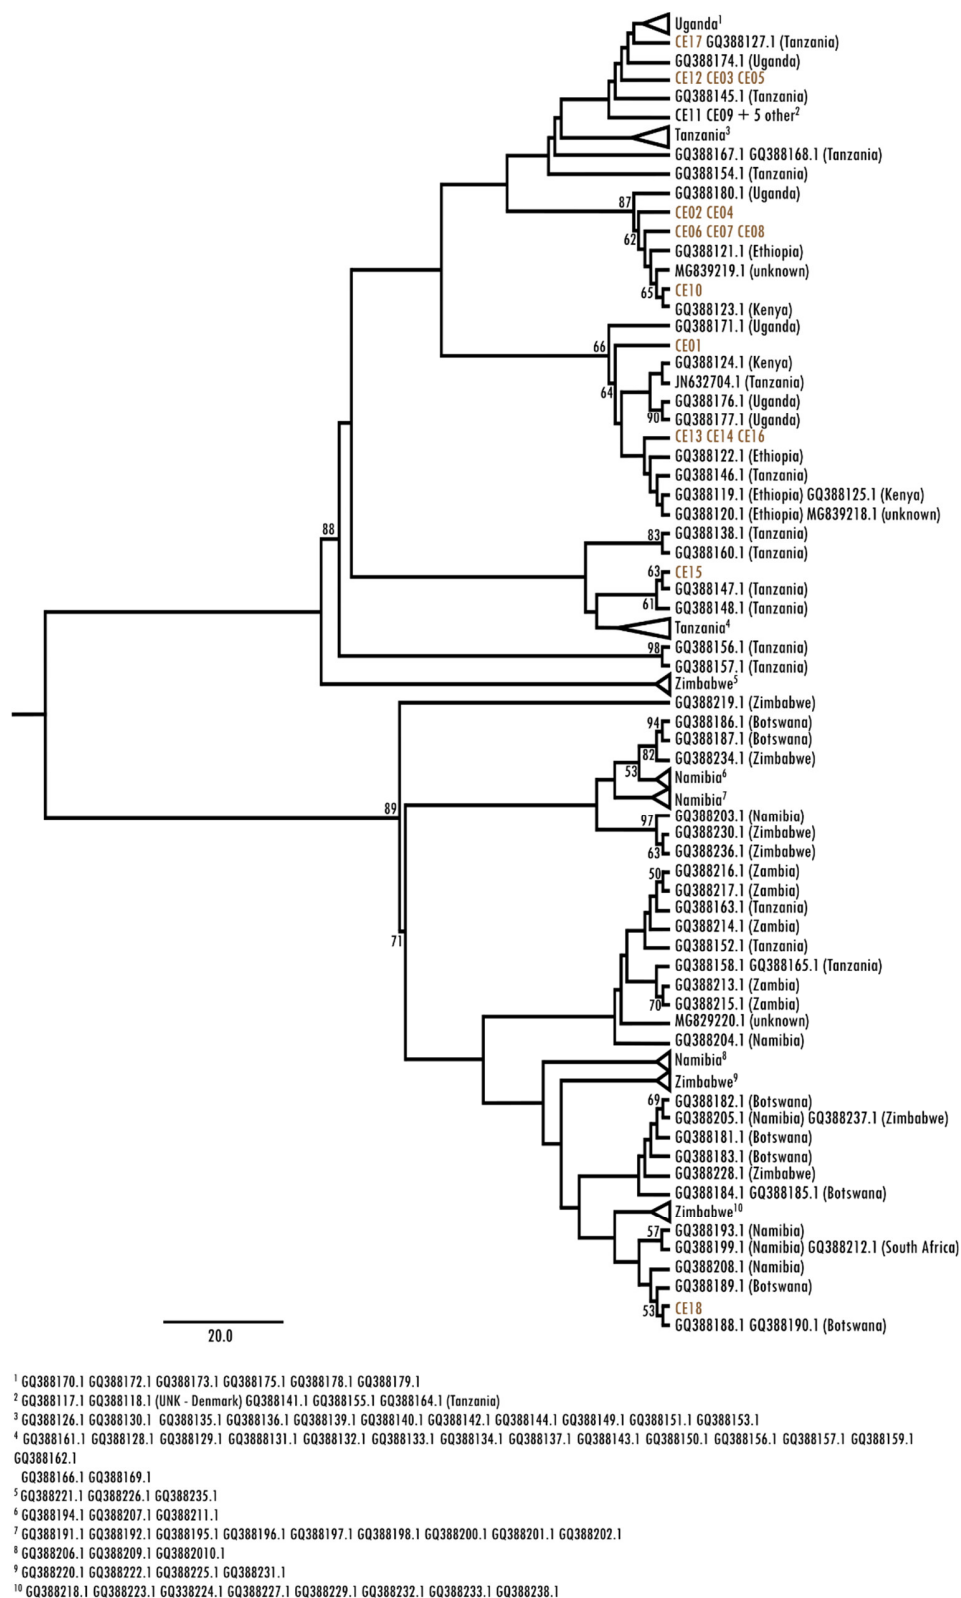

**Figure S6.** Neighbor-joining phylogenetic tree for common eland. Samples from this study are shown in brown and identified by their unique codes (see Table S4). Sequences from the NCBI nucleotide database are referred to by their accession numbers, and their country of origin is indicated in brackets.

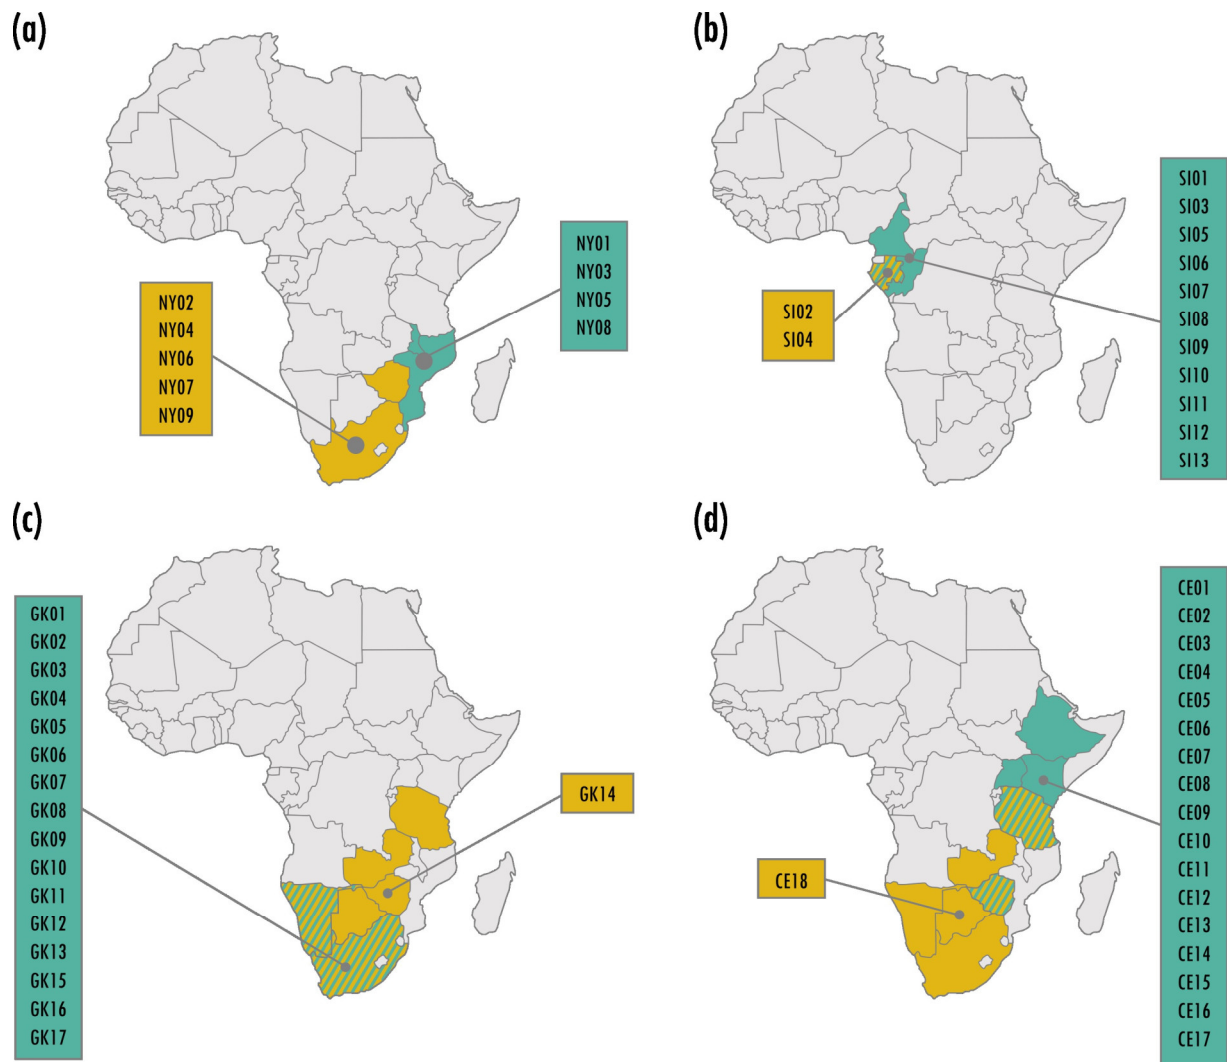

**Figure S7.** Overview of geographic distribution of genetically distinct clades in (a) nyala, (b) sitatunga, (c) greater kudu, (d) common eland, created based on the phylogenetic trees and haplotype networks. Each color represents one clade, and hatched areas indicate overlap of two clades. Lists of samples analyzed in this study clustering with each of the clades are provided using their unique codes (see Table S4 for accession numbers of the sequences).
